# Supplementary material for: Prognostic value of receptor conversion after neoadjuvant chemotherapy in breast cancer patients: a prospective observational study
Source: PubMed Central journal article supplement (PMC4496242; doi:10.18632/oncotarget.3292), 2015-03-16
Supplement: oncotarget-06-9600-s001.pdf [file oncotarget-06-9600-s001.pdf]

SUPPLEMENTARY FIGURES AND TABLE

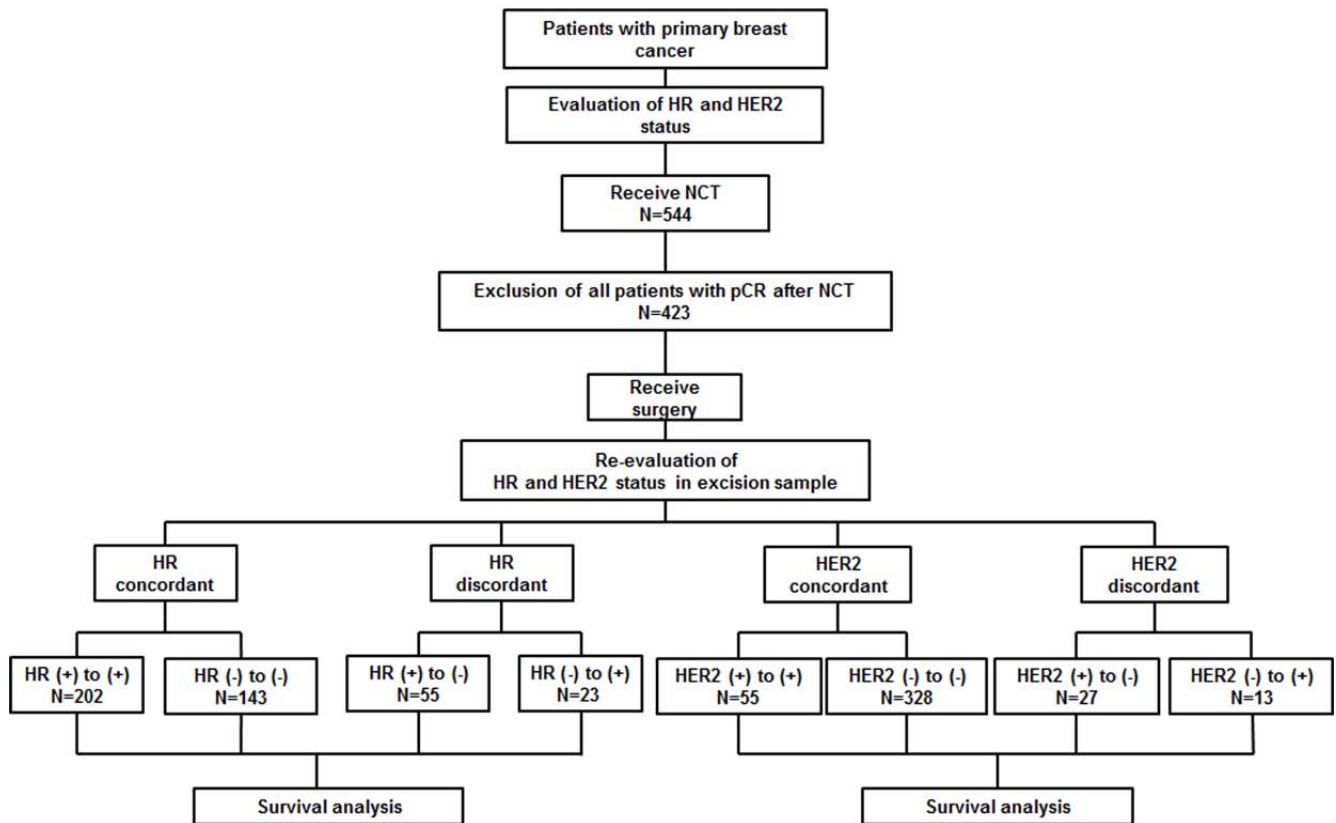

**Supplementary Figure S1: Flow diagram of the study design.** A total of 423 patients who received neoadjuvant chemotherapy (NCT) and had residual tumors were included in this study.

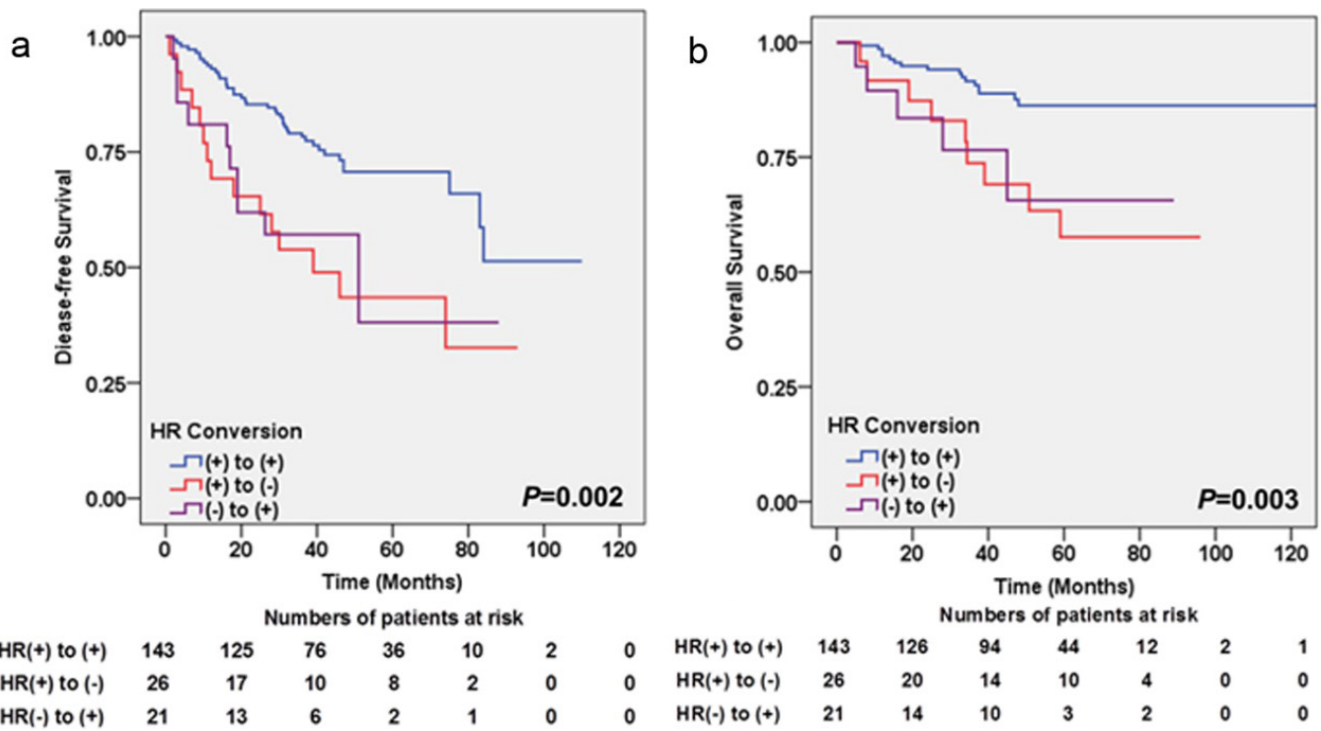

Supplementary Figure S2: Kaplan-Meier estimates of DFS and OS of HR conversion among 190 hormone therapy-administered patients a. DFS (log-rank test:  $P = 0.002$ ), b. OS (log-rank test:  $P = 0.003$ ).

**Supplementary Table S1: Univariate analyses of DFS and OS of non-pCR patients with neoadjuvant chemotherapy (n = 423)**

| Variables                   | ALL |      | Univariate analysis |                    |       |                     |
|-----------------------------|-----|------|---------------------|--------------------|-------|---------------------|
|                             | n   | %    | DFS                 |                    | OS    |                     |
|                             |     |      | P                   | HazR(95%CI)        | P     | HazR(95%CI)         |
| <b>Age</b>                  |     |      | 0.946               |                    | 0.563 |                     |
| ≤ 40 years                  | 72  | 17.0 |                     |                    |       |                     |
| > 40 years                  | 351 | 83.0 |                     |                    |       |                     |
| <b>Menopausal Status</b>    |     |      | 0.239               |                    | 0.289 |                     |
| Pre                         | 246 | 58.2 |                     |                    |       |                     |
| Post                        | 177 | 41.8 |                     |                    |       |                     |
| <b>Initial Tumor Status</b> |     |      | 0.058               |                    | 0.031 |                     |
| T1                          | 4   | 0.9  |                     |                    |       | 1                   |
| T2                          | 134 | 31.7 |                     |                    | 0.759 | 0.732(0.099–5.401)  |
| T3                          | 212 | 50.1 |                     |                    | 0.898 | 1.138(0.157–8.220)  |
| T4                          | 73  | 17.2 |                     |                    | 0.590 | 1.734(0.234–12.857) |
| <b>Initial Node Status</b>  |     |      | 0.049               |                    | 0.018 |                     |
| negative                    | 107 | 25.3 |                     | 1                  |       | 1                   |
| positive                    | 316 | 74.7 | 0.049               | 1.444(1.001–2.083) | 0.018 | 1.867(1.111–3.137)  |
| <b>Initial HR Status</b>    |     |      | 0.220               |                    | 0.091 |                     |
| negative                    | 166 | 39.2 |                     |                    |       |                     |
| positive                    | 257 | 60.8 |                     |                    |       |                     |
| <b>Initial HER2 Status</b>  |     |      | < 0.001             |                    | 0.001 |                     |
| negative                    | 341 | 80.6 |                     | 1                  |       | 1                   |
| positive                    | 82  | 19.4 | < 0.001             | 1.830(1.313–2.551) | 0.001 | 2.028(1.344–3.060)  |
| <b>NCT Regimens</b>         |     |      | 0.077               |                    | 0.035 |                     |
| PC                          | 105 | 24.8 |                     |                    |       | 1                   |
| CEF                         | 119 | 28.1 |                     |                    | 0.006 | 2.472(1.294–4.723)  |
| NE                          | 169 | 39.9 |                     |                    | 0.099 | 1.721(0.903–3.277)  |
| TE                          | 26  | 6.1  |                     |                    | 0.125 | 2.018(0.823–4.952)  |
| others                      | 4   | 0.9  |                     |                    | 0.028 | 5.384(1.204–24.083) |
| <b>NCT Cycles</b>           |     |      | 0.006               |                    | 0.125 |                     |
| 1–2                         | 106 | 25.1 |                     | 1                  |       |                     |
| 3–4                         | 272 | 64.3 | 0.121               | 0.765(0.545–1.073) |       |                     |
| 5–6                         | 45  | 10.6 | 0.081               | 1.526(0.949–2.454) |       |                     |

(Continued)

| Variables                                  | ALL |      | Univariate analysis |                    |         |                    |
|--------------------------------------------|-----|------|---------------------|--------------------|---------|--------------------|
|                                            | n   | %    | DFS                 |                    | OS      |                    |
|                                            |     |      | P                   | HazR(95%CI)        | P       | HazR(95%CI)        |
| <b>Response to NCT</b>                     |     |      | 0.028               |                    | 0.090   |                    |
| PR                                         | 229 | 54.1 |                     | 1                  |         |                    |
| SD/PD                                      | 194 | 45.9 | 0.028               | 1.392(1.036–1.870) |         |                    |
| <b>Tumor Size at Surgery</b>               |     |      | 0.001               |                    | 0.049   |                    |
| ≤ 2 cm                                     | 152 | 35.9 |                     | 1                  |         | 1                  |
| > 2 and ≤ 5cm                              | 206 | 48.7 | 0.197               | 1.255(0.889–1.771) | 0.660   | 1.104(0.710–1.718) |
| > 5cm                                      | 65  | 15.4 | < 0.001             | 2.155(1.422–3.265) | 0.021   | 1.859(1.099–3.147) |
| <b>Number of Involved Nodes at Surgery</b> |     |      | < 0.001             |                    | < 0.001 |                    |
| 0                                          | 76  | 18.0 |                     | 1                  |         | 1                  |
| 1–3                                        | 127 | 30.0 | 0.155               | 1.496(0.859–2.604) | 0.175   | 1.706(0.789–3.688) |
| ≥ 4                                        | 220 | 52.0 | < 0.001             | 2.849(1.734–4.682) | 0.001   | 3.327(1.665–6.650) |
| <b>Vascular Invasion</b>                   |     |      | 0.087               |                    | 0.081   |                    |
| negative                                   | 230 | 54.4 |                     |                    |         |                    |
| positive                                   | 88  | 20.8 |                     |                    |         |                    |
| unknown                                    | 105 | 24.8 |                     |                    |         |                    |
| <b>Histologic Grade</b>                    |     |      | 0.670               |                    | 0.519   |                    |
| 1                                          | 3   | 0.7  |                     |                    |         |                    |
| 2                                          | 159 | 37.6 |                     |                    |         |                    |
| 3                                          | 42  | 10.0 |                     |                    |         |                    |
| unknown                                    | 219 | 51.8 |                     |                    |         |                    |
| <b>Ki67 at Surgery</b>                     |     |      | 0.465               |                    | 0.856   |                    |
| High (≥ 15%)                               | 146 | 34.5 |                     |                    |         |                    |
| Low (< 15%)                                | 229 | 54.1 |                     |                    |         |                    |
| unknown                                    | 48  | 11.3 |                     |                    |         |                    |
| <b>HR Status at Surgery</b>                |     |      | 0.001               |                    | < 0.001 |                    |
| negative                                   | 198 | 46.8 |                     | 1                  |         | 1                  |
| positive                                   | 225 | 53.2 | 0.001               | 0.617(0.459–0.830) | < 0.001 | 0.491(0.331–0.728) |
| <b>HER2 Status at Surgery</b>              |     |      | 0.109               |                    | 0.009   |                    |
| negative                                   | 355 | 83.9 |                     |                    |         | 1                  |
| positive                                   | 68  | 16.1 |                     |                    | 0.009   | 1.187(1.160–2.847) |

(Continued)

| Variables                         | ALL |      | Univariate analysis |                    |         |                    |
|-----------------------------------|-----|------|---------------------|--------------------|---------|--------------------|
|                                   | n   | %    | DFS                 |                    | OS      |                    |
|                                   |     |      | P                   | HazR(95%CI)        | P       | HazR(95%CI)        |
| <b>Adjuvant Chemotherapy</b>      |     |      | 0.064               |                    | 0.724   |                    |
| No                                | 62  | 14.7 |                     |                    |         |                    |
| Yes                               | 313 | 73.9 |                     |                    |         |                    |
| unknown                           | 48  | 11.3 |                     |                    |         |                    |
| <b>Adjuvant Hormone Therapy</b>   |     |      | 0.025               |                    | 0.001   |                    |
| No                                | 185 | 43.7 |                     | 1                  |         | 1                  |
| Yes                               | 190 | 44.9 | 0.025               | 0.691(0.501–0.955) | 0.001   | 0.477(0.306–0.742) |
| unknown                           | 48  | 11.3 |                     |                    |         |                    |
| <b>Adjuvant Radiotherapy</b>      |     |      | 0.464               |                    | 0.986   |                    |
| No                                | 139 | 32.9 |                     |                    |         |                    |
| Yes                               | 236 | 55.8 |                     |                    |         |                    |
| unknown                           | 48  | 11.3 |                     |                    |         |                    |
| <b>HR Conversion</b>              |     |      | < 0.001             |                    | < 0.001 |                    |
| (+) to (+)                        | 202 | 47.8 |                     | 1                  |         | 1                  |
| (-) to (-)                        | 143 | 33.8 | 0.026               | 1.475(1.047–2.079) | 0.005   | 1.904(1.211–2.993) |
| (+) to (-)                        | 55  | 13.0 | < 0.001             | 2.497(1.660–3.757) | < 0.001 | 3.087(1.830–5.208) |
| (-) to (+)                        | 23  | 5.4  | 0.075               | 1.785(0.944–3.377) | 0.089   | 2.123(0.891–5.060) |
| <b>HER2 Conversion</b>            |     |      | 0.001               |                    | 0.009   |                    |
| (+) to (+)                        | 55  | 13.0 |                     | 1                  |         | 1                  |
| (-) to (-)                        | 328 | 77.5 | 0.032               | 0.641(0.428–0.961) | 0.003   | 0.488(0.302–0.788) |
| (+) to (-)                        | 27  | 6.4  | 0.102               | 1.621(0.908–2.893) | 0.984   | 1.007(0.488–2.079) |
| (-) to (+)                        | 13  | 3.1  | 0.513               | 0.729(0.282–1.883) | 0.581   | 0.712(0.213–2.379) |
| <b>Tumor Phenotype Conversion</b> |     |      | < 0.001             |                    | 0.007   |                    |
| concordant nTN                    | 213 | 50.3 |                     | 1                  |         | 1                  |
| concordant TN                     | 110 | 26.0 | 0.508               | 1.134(0.781–1.648) | 0.224   | 1.346(0.834–2.171) |
| discordant nTN                    | 46  | 10.9 | 0.177               | 1.404(0.858–2.298) | 0.055   | 1.838(0.986–3.426) |
| discordant TN                     | 54  | 12.8 | < 0.001             | 2.471(1.668–3.660) | 0.001   | 2.356(1.416–3.918) |

CEF: Cyclophosphamide + Epirubicin + 5-fluorouracil; CI: confidence interval; DFS: disease-free survival; HazR: hazard ratio; HER2: human epidermal receptor 2; HR: hormone receptor; NCT: neoadjuvant chemotherapy; NE: Navelbine + Epirubicin; nTN: non-triple negative; OS: overall survival; PC: Paclitaxel + Carboplatin; PR: partial response; SD/PD: stable disease or progression of disease; TE: Docetaxel + Epirubicin; TN: triple-negative.
